# Supplementary material
Source: Springer Nature journal article supplement (https://www.springermedizin.de/resource/supplementary/13256_2007_155_MOESM1_ESM.pdf/9645390)

**a) Serum Creatinine and Urine Ox:Cr Ratio    b) % Creatinine Clearance vs. Clinical Timeline**

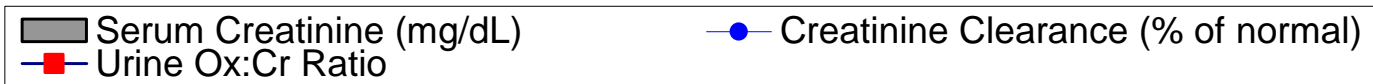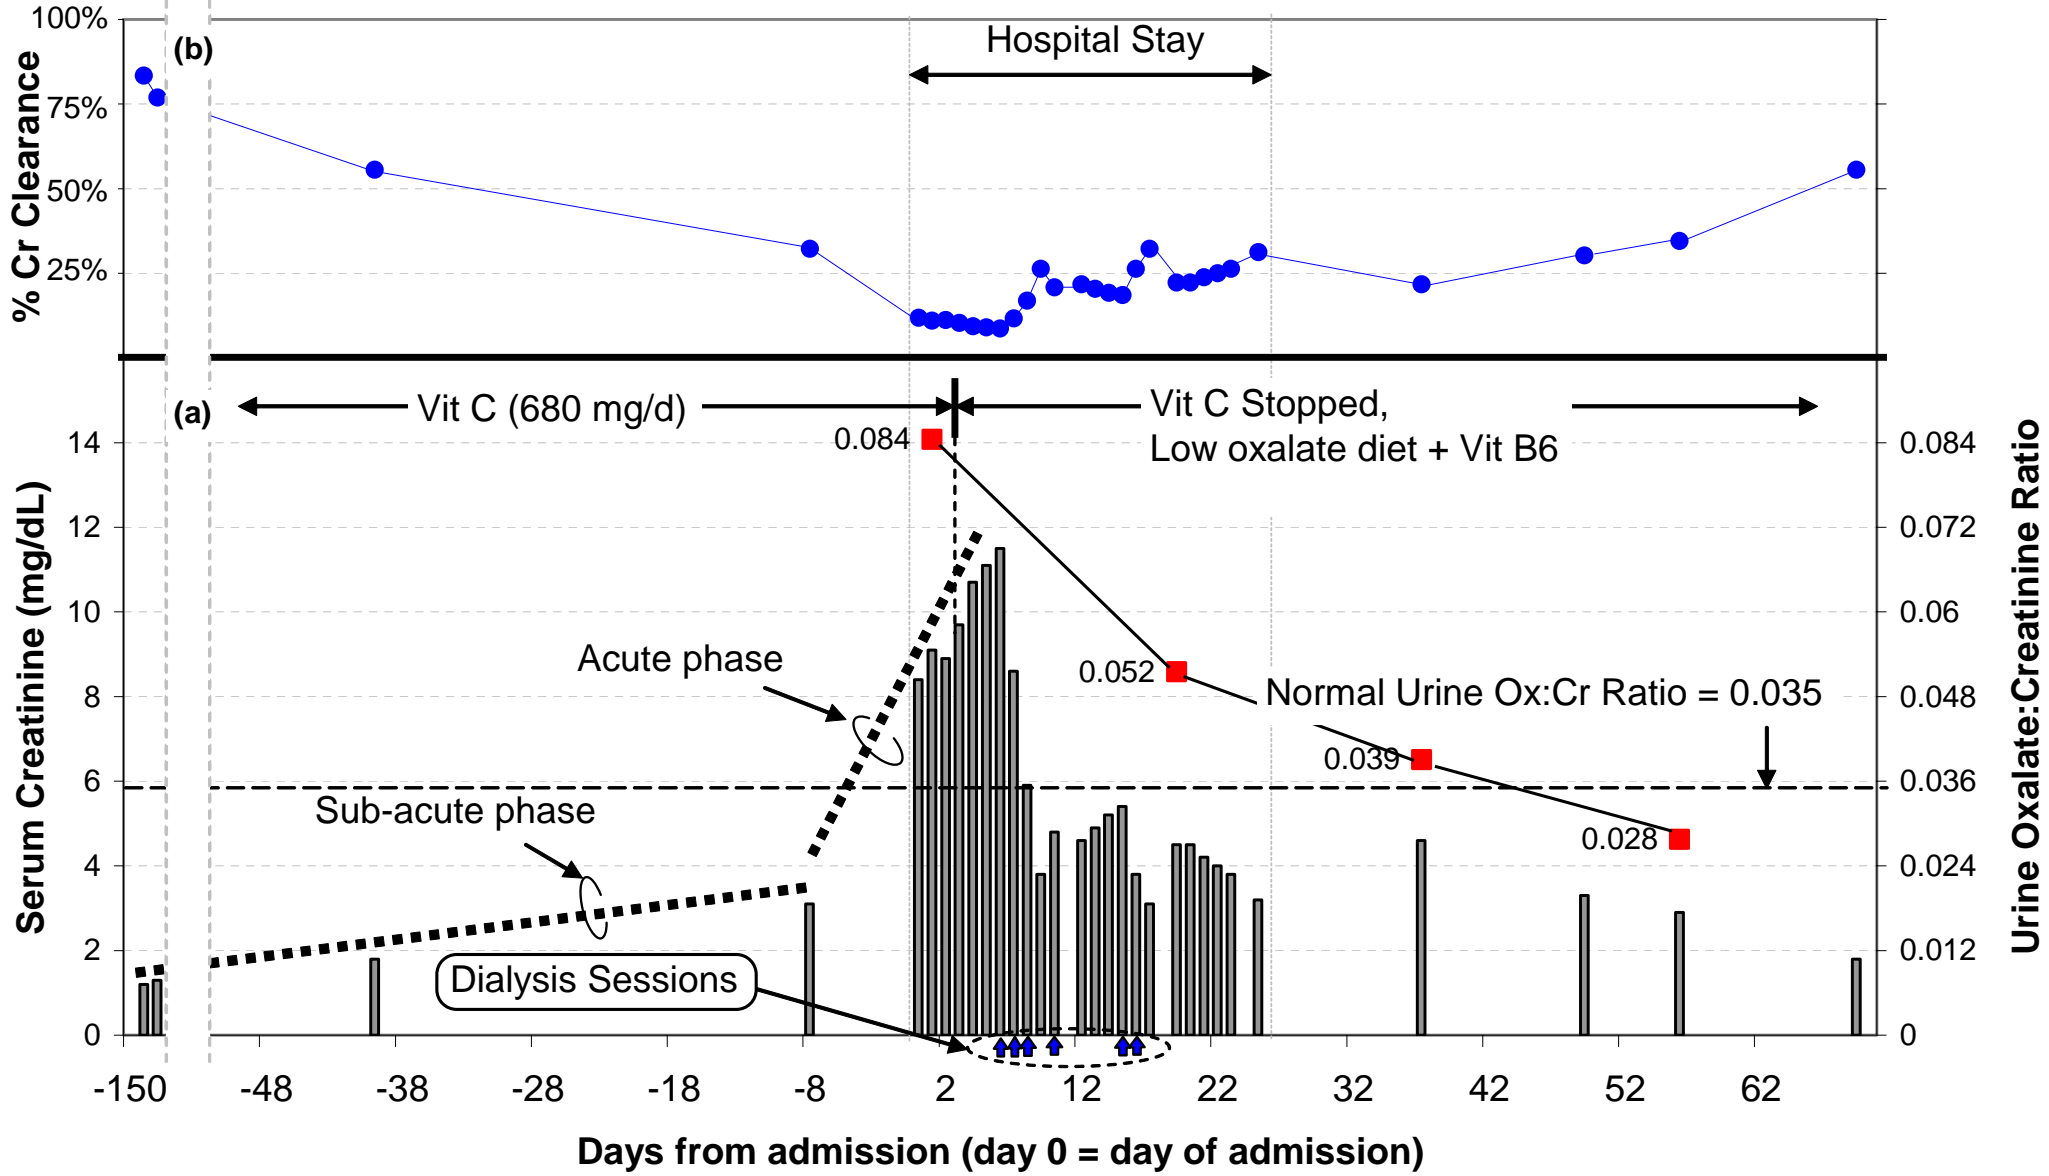

Supplement: MOESM1 [file 9645390]
